# Supplementary material
Source: PubMed Central journal article supplement (PMC4326534)

## Supplemental Figure Legends

### **Fig. S1. Validation of laser capture microdissection transcriptional analyses of the chicken**

**DM.** In situ hybridization at HH21, using indicated probes. Scale bars: 50  $\mu\text{m}$ .

### **Fig. S2. Live imaging setup for time lapse of transient D-V cords and TUNEL assay.**

**A** Tie-1 H2B-YFP transgenic quails with wholemount view (**B**) of D-V endothelial cords. **C** Embryos are sliced into 150  $\mu\text{m}$  transverse sections and then (**D**) embedded in low melting point agarose for imaging on glass-bottom culture plates. **E** Example of YFP fluorescent tissue slice, showing bilateral (left panel) and left-sided (right panel) endothelial cords; these panels are simplified in a cartoon model (**G**). (**H-J**) TUNEL assay of Tie-1 H2B-YFP transgenic quails demonstrating in **H** the absence of TUNEL-positive cells (red) in the DM and in Tie-1 H2B-YFP expressing endothelial cells (green, arrowhead); TUNEL-positive cells in the apoptotic mesonephros (MSN, boxed region of **H** is magnified in **I**) and in the limb bud AER (apical ectodermal ridge, **J**, from the same embryo as **H**).

### **Fig. S3. Analysis of arterial vasculogenesis in chicken and mice.**

Asymmetric formation of D-V cords in mice at E.10.75 (*Gja5*). Scale bar: 50  $\mu\text{m}$ .

### **Fig. S4. Analysis of Cxcr4/Cxcl12 expression downstream of Pitx2.**

**A** ISH at HH14 (chicken) reveals *Cxcr4* expression (**left panel**) in Tie1-expressing (H2B-YFP, **right panel**) endothelial cells of the bilateral intervening plexus (black arrowheads). **B** Later, *Cxcr4* expression is found both in the 1<sup>0</sup>LA and gut plexus, but not the CMA. **C**, Misexpression of Pitx2/GFP in the right DM (right panel GFP marks electroporated cells) causes left isomerism (“double-left”

phenotype) including double *Cxcr4*-positive arterial cords (orange arrowheads) and duplicated  $1^0$ LA (red arrows). **D** Loss of *Cxcl12* expression in the DM of *Pitx2*<sup>-/-</sup> mouse (E12.0), with left lateral (**top two rows**) and transverse views shown (**third row**). Positive control tissue from matched embryos (**bottom row**) reveals *Cxcl12* staining in the scleratome. **E** *Pitx2* binding at vascular network genes in vivo. **(1-2)** 5 enriched *Pitx2* binding peaks surround *Cxcl12* **(1)**, one of which directly overlaps with exon 1 on *Cxcl12* **(2)**. **(3-4)** No significant *Pitx2* binding is observed at the *Cxcr4* locus, the promoter of the adjacent gene *Dars* contains an enriched peak **(3)** but no peaks are observed in the promoter proximal region of *Cxcr4* **(4)**. ChIP-seq data derive from published transgenic FLAG-tagged *Pitx2* binding in 12-week mouse cardiac tissue (NCBI Gene Expression Omnibus (GEO) data repository accession GSE50401): top green track shows normalized ChIP-seq tag numbers (y-axis) and the user supplied track below shows peaks with at least 4-fold enrichment over input control indicated as vertical black bars. RefSeq gene models are indicated in blue, while bottom track shows PhastCons vertebrate conservation score in green. Scale bars: **A** 50  $\mu$ m; **B** 100  $\mu$ m.

**Fig. S5. Side-specific effects of AMD3100 inhibitor-soaked beads on *Pitx2* expression and DM morphology.** AMD3100 has no effect on normal left-sided *Pitx2* expression (**left panel**) or cellular morphology (**right panel**) of the DM. Scale bars: 50  $\mu$ m.

**Fig. S6. *Cxcl12* is not sufficient to drive vessel formation in the absence of *Pitx2*.** A Misexpression of *Cxcl12* (pCAG-*Cxcl12*/pCAG-GFP) on the right side via co-electroporation produces normal L-R DM cellular morphology (fast green), results in ectopic levels of *Cxcl12* that exceed those on the left side (ISH, *Cxcl12*), and is not sufficient to promote formation of

ectopic D-V cords in the right DM (ISH, *Gja5*, black dashed box). **B** Results of left-sided and right-sided targeting of *Cxcl12* in the DM at HH21 (ISH, *Gja5*, model cartoon included). Transverse views shown to appreciate L-R situs and lateral view (Cranial-Caudal) to appreciate the extent of  $1^0$ LA formation. **(1)** Wild type DM showing left-sided D-V cord (orange arrowhead) and  $1^0$ LA formation (red arrow). **(2)** ‘Double-left’ phenotype with right-sided *Pitx2* electroporation (GFP) showing left- and right-sided D-V cords and two  $1^0$ LA. **(3)** Right-sided *Cxcl12* electroporation (GFP) showing ectopic  $1^0$ LA forming on the right side as a result of accelerated remodeling of the left-sided, *Cxcr4*-positive **(4)** D-V cords (see also Fig. 6). This result is in contrast to **(2)** highlighting an important functional difference between *Pitx2* and *Cxcl12* in the DM. **(5)** Left-sided *Cxcl12* electroporation (GFP) showing accelerated formation of  $1^0$ LA as a result of accelerated remodeling of the left-sided D-V cords. **C** The diffusion range of AMD3100 inhibitor does not allow it to cross the midline boundary of the DM: inhibitor beads placed on the right side (**middle panel**, right lateral view) have no effect on the normal left-sided assembly of endothelial cords (**right panel**, arrowhead) and  $1^0$ LA (**left panel**, arrow). Bead positions are indicated. Scale bars: **A-B** 50  $\mu$ m; **C** 100  $\mu$ m.

**Fig. S7 Lymphatic marker expression in tissues surrounding the DM.** **A** *Prox1*-GFP-marked lymphatic anlagen in the retroperitoneal lymph sac (RLS), caudal cardinal veins (CCV) and non-lymphatic staining in the sympathetic trunk (ST) and neural tube (NT). **B** Adjacent transverse sections showing that location of lymphatic anlagen (green arrows) in three different HH27 chicken embryos, marked by *Prox1* (**left column**) and *Vegfr3* (**middle column**) is spatially distinct from *Prox1*-expressing cells of the avian-specific Nerve of Remak (*Hnk1*-positive, **right column**). **C Top row** Wholemount (left) and transverse views (right) of wild type mouse DM

stained with anti-Prox1; lymphatic plexus is first visible ventrally (white arrows, higher magnification inset) that extends dorsally. **Bottom row** Absence of Prox1-GFP reporter signal in mouse cranial or caudal DM prior to E10.5, revealed by transverse section of E10 Prox1 transgenic reporter mice. Scale bars: **A-B** 50  $\mu\text{m}$ .

**Fig. S8 Local lymphangiogenesis in the left DM requires the preceding Pitx2-driven arterial program.** **A** *Vegfr3* expression (ISH) is absent from *Pitx2*<sup>-/-</sup> mutant DM at E13.5 but remains unchanged along the CMA. **B**, Cxcr4/Cxcl12-inhibiting AMD3100 beads (**right panel**) on the left side of the chicken DM abrogate the *Lyve1*-positive network (HH23), compared to PBS beads (**left panel**). **C** Wholemout double immunohistochemistry for Prox1 (green) and PECAM/CD31 (red) reveals loss of Prox1 staining (asterisk) in the DM of *Cxcr4*<sup>-/-</sup> mutant mouse embryos at E13.5 (**middle panel**) compared to wild type littermates (**left panel**). Peripheral limb lymphatics are unchanged in matched embryos (**right column**). **D** Arteriogenesis-inhibiting Quinidine beads on the left side of the chicken DM have no effect on *Cxcl12* expression (HH21). Scale bars: **A** 50  $\mu\text{m}$ ; **B-D** 50  $\mu\text{m}$ .

**Movie S1. Right-sided endothelial cord regression in midgut explants of Tie-1-H2B-eYFP quail embryos.** **Left panel:** Select nuclei of endothelial cells of right DM were manually tracked with dragon tails (Bitplane Imaris software). **Right panel:** Tracking of select endothelial nuclei of the left cord (green), right cord (red) and dorsal aorta (blue). At time T=0 (HH17, 60 hours), bilateral endothelial cords are present in the DM. At T=4.5 hours (HH18, 65 hours), cells of the right side endothelial cords have significantly regressed and by T=6.5 hours (HH19, 70.5 hours) the regression is complete.

**Movie S2. Right to left endothelial cell migration in midgut explants of Tie-1-H2B-eYFP quail embryos.** **Left panel:** Select nuclei of endothelial cells of right DM were manually tracked with dragon tails (Bitplane Imaris software). **Right panel:** Tracking of select endothelial nuclei of the left cord (green), right cord (red) and dorsal aorta (blue). Starting at HH19, time-lapse imaging reveals that cells within right-sided endothelial cords regress, migrate and anastomose with the left endothelial cords giving rise to vasculature asymmetries in the DM.

**Movie S3: Complete regression and endothelial cell emigration of right-sided arterial cord.** **Left panel:** Time-lapse of Tie-1 H2B-eYFP quail embryo midgut explants shows remodeling of the intervening endothelial plexus to yield the left DV arterial cord. At time  $T = 0$  (HH17), bilateral endothelial cords are present in the DM. At  $T = 5$  hours (HH18), cells of the right side endothelial cords have significantly regressed and by  $T = 10.5$  hours (HH19) regression is complete. By  $T = 13.5$  hours (HH20) we find that regressed cells from the right migrate left and contribute to the left endothelial cord. **Right panel:** Select nuclei of endothelial cells of the left and right cord, and left and right dorsal aortae are labeled with green, red, purple and blue spots, respectively; tracking of these spots models the cell movements in the left panel movie.

Fig. S1

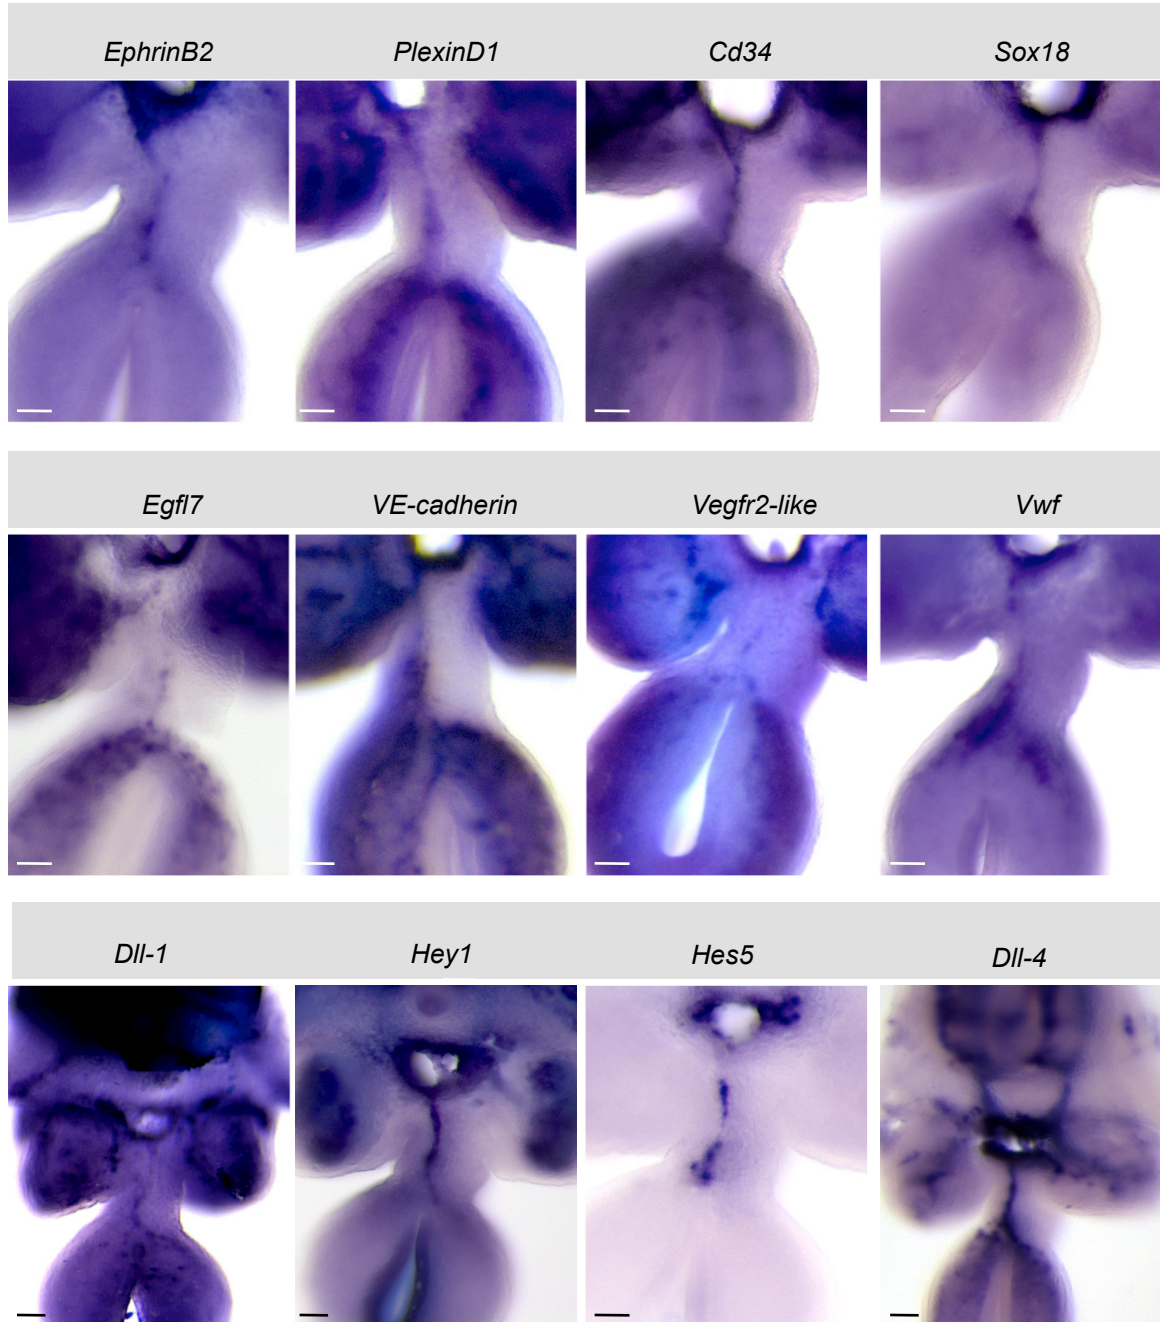

Fig. S2

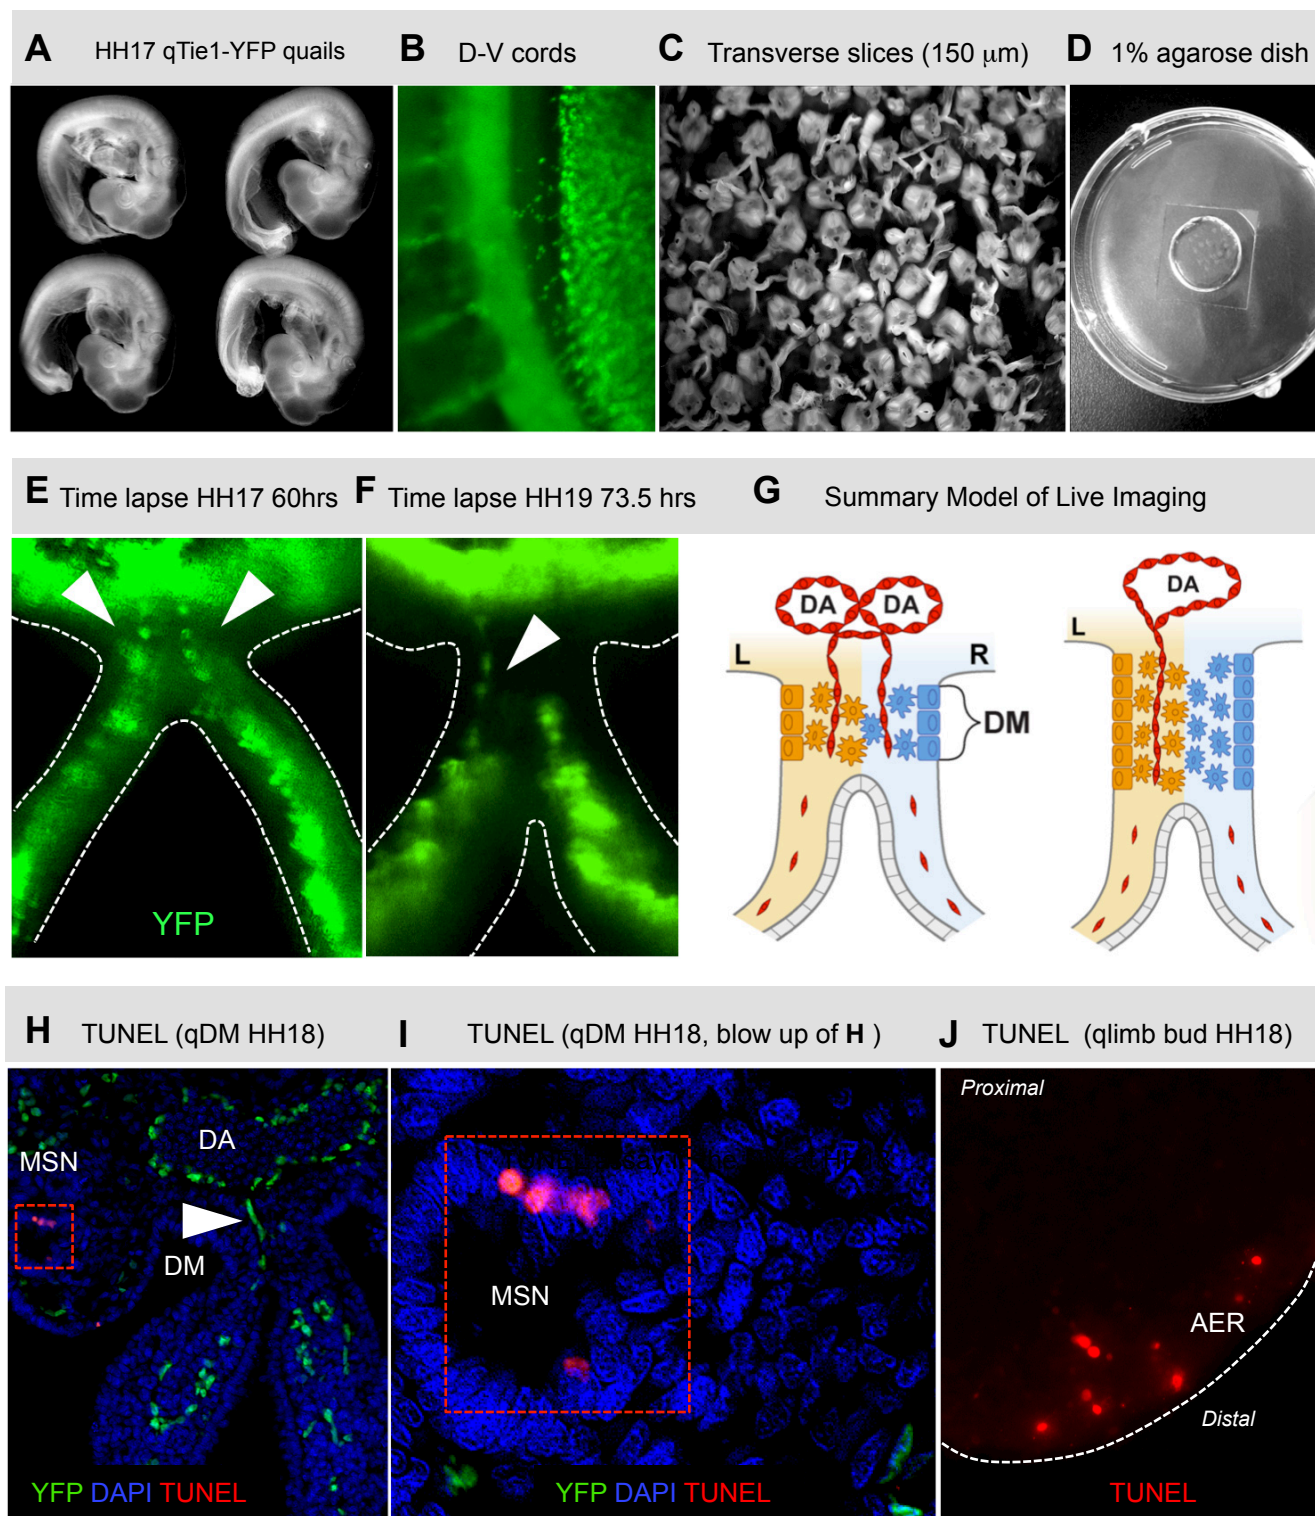



**Fig. S3**

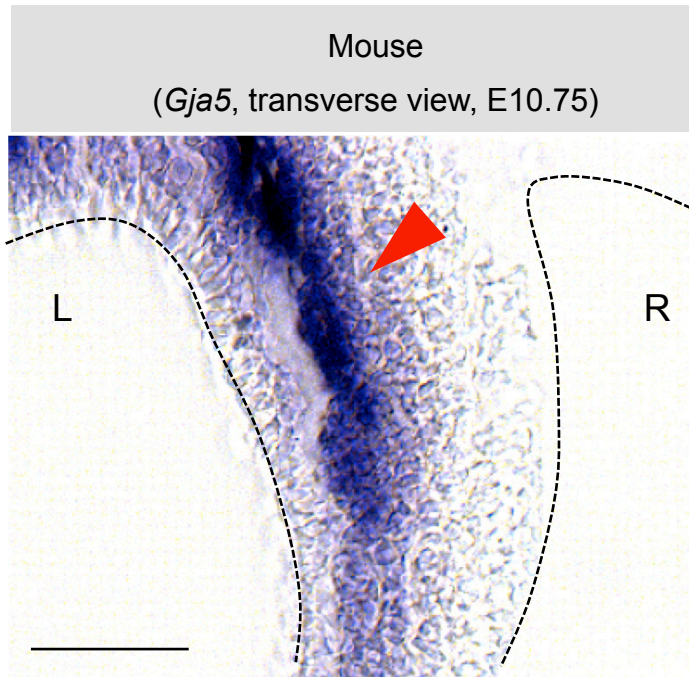



**Fig. S4**

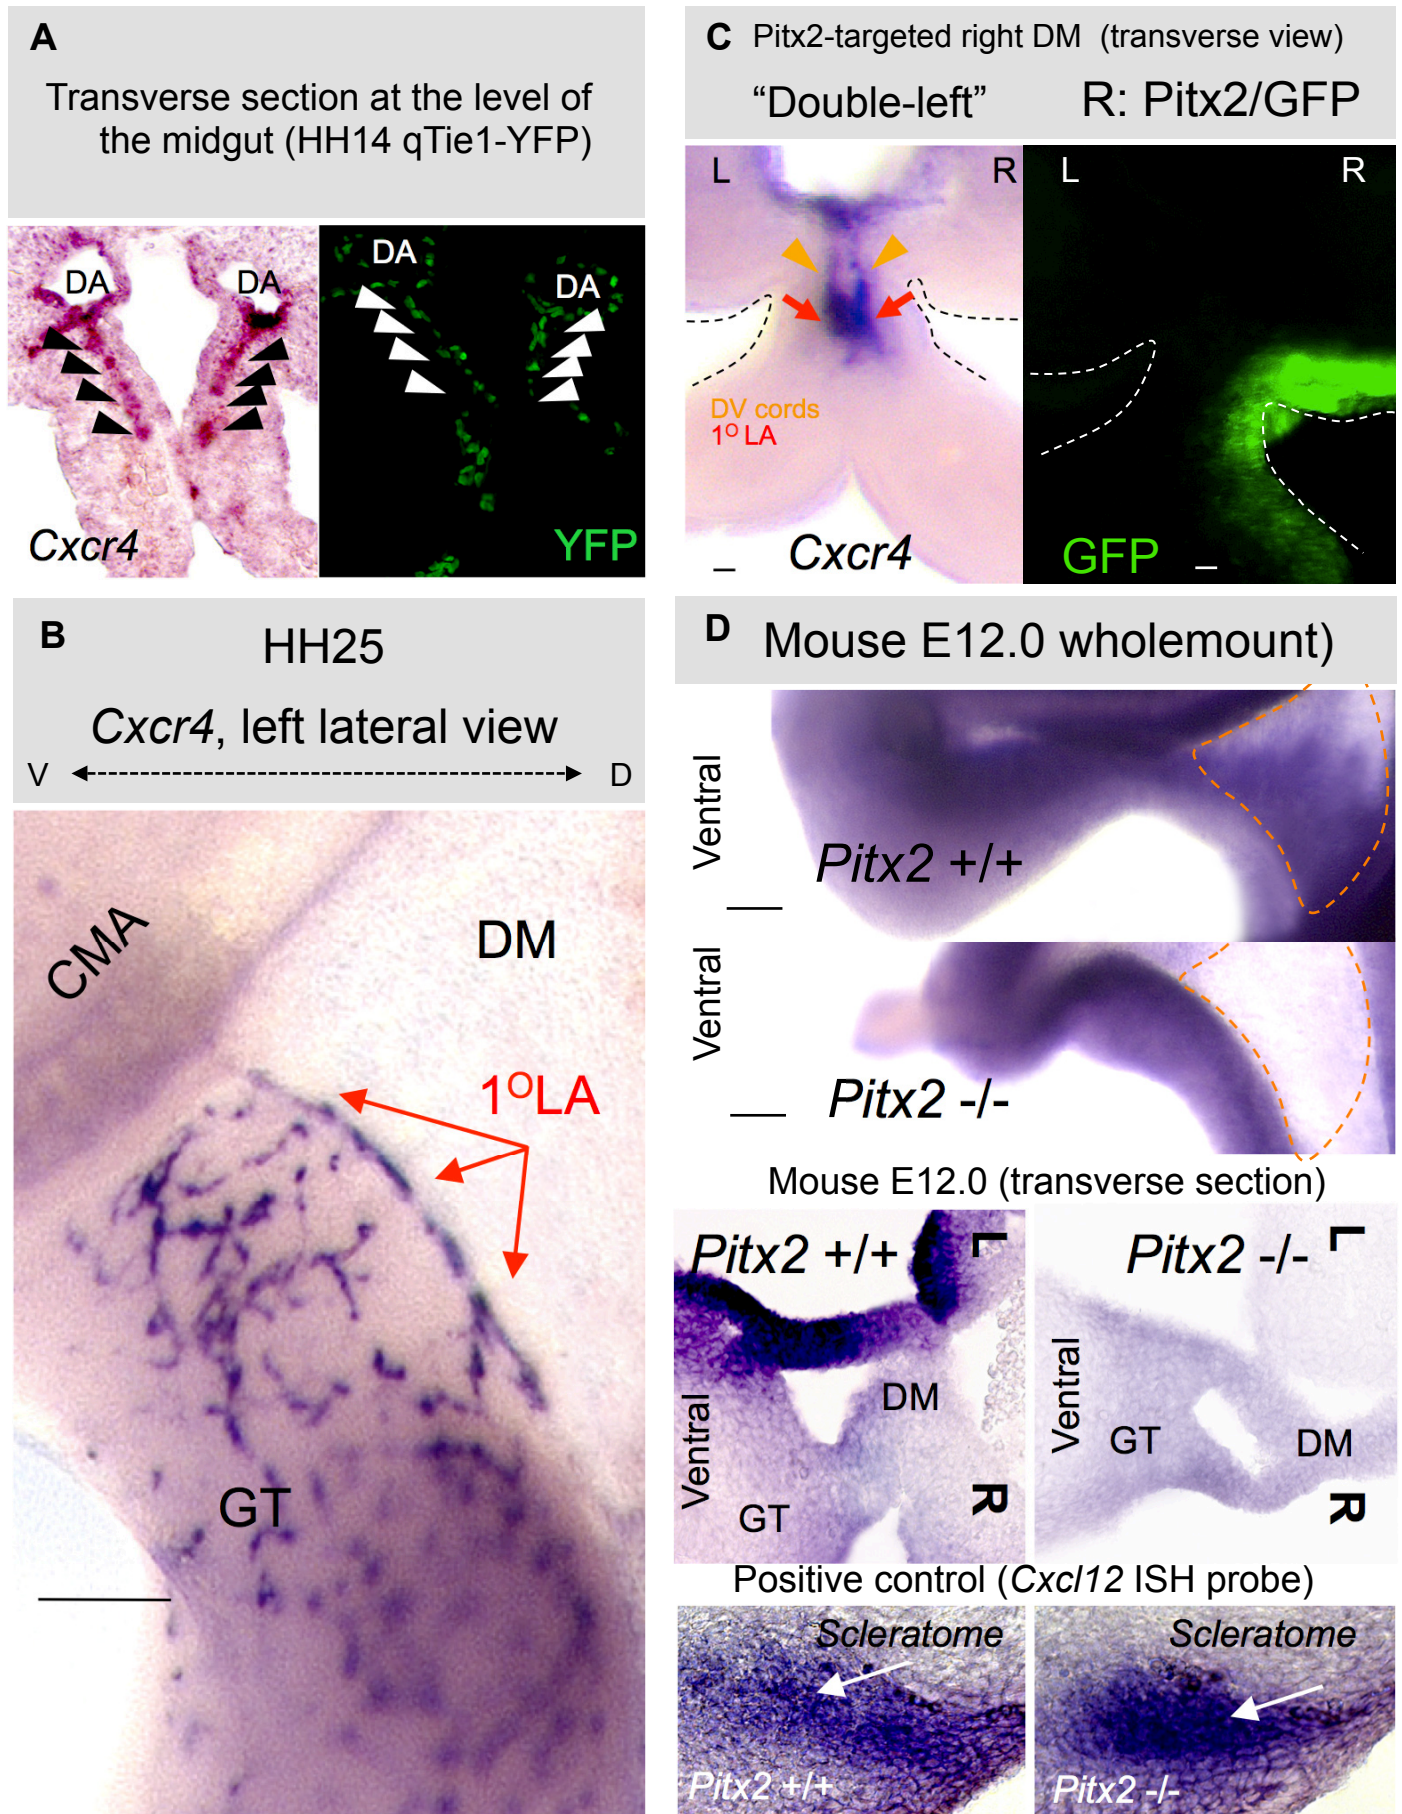

Fig. S4

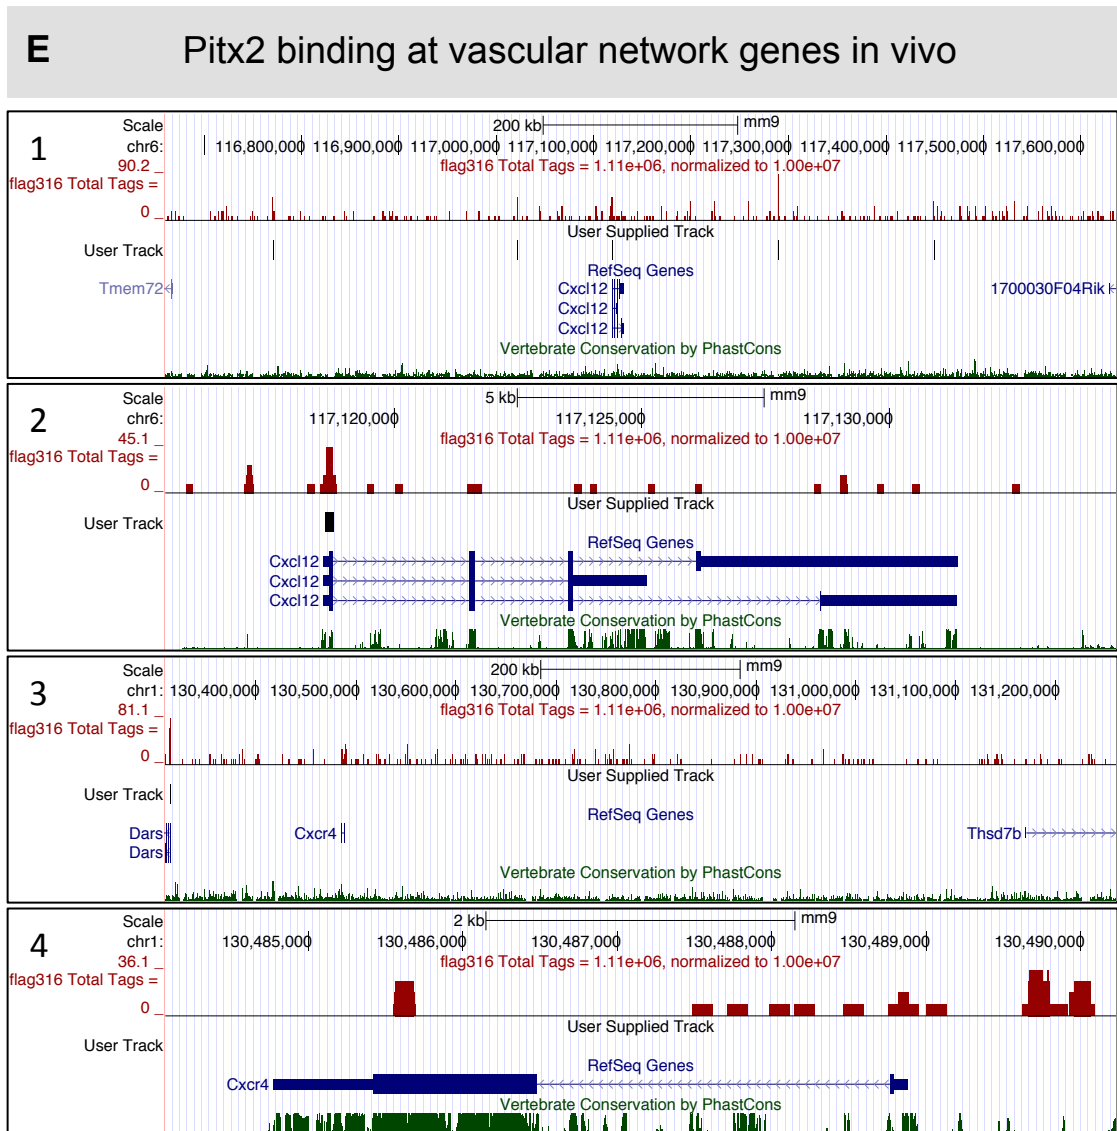

Fig. S5

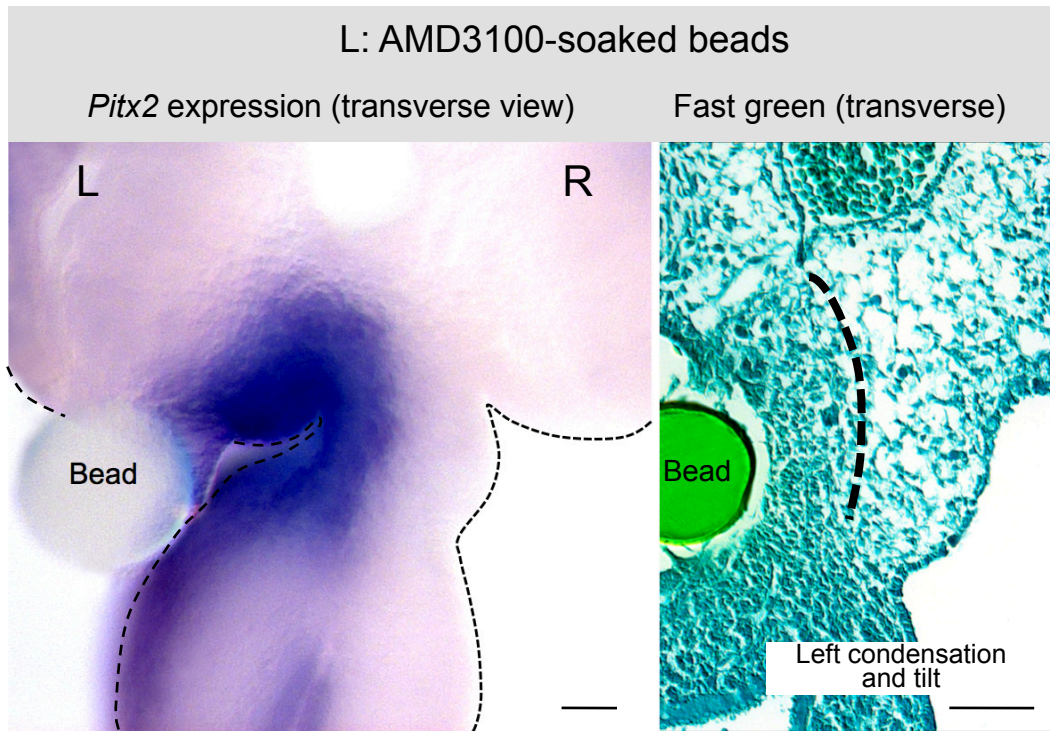



Fig. S6

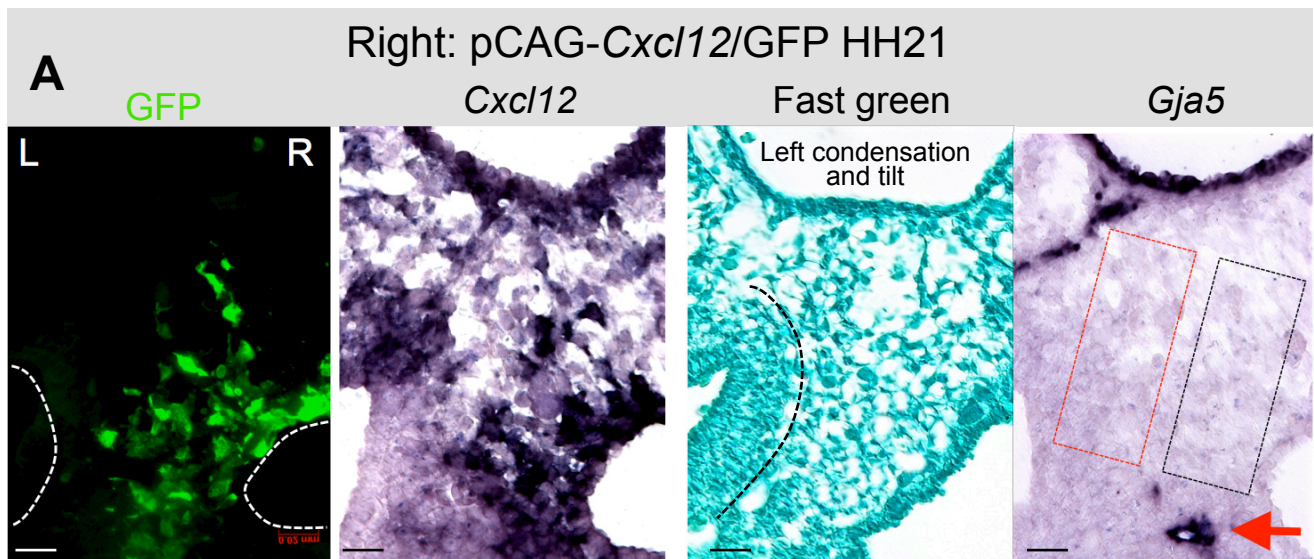

**Fig. S6**

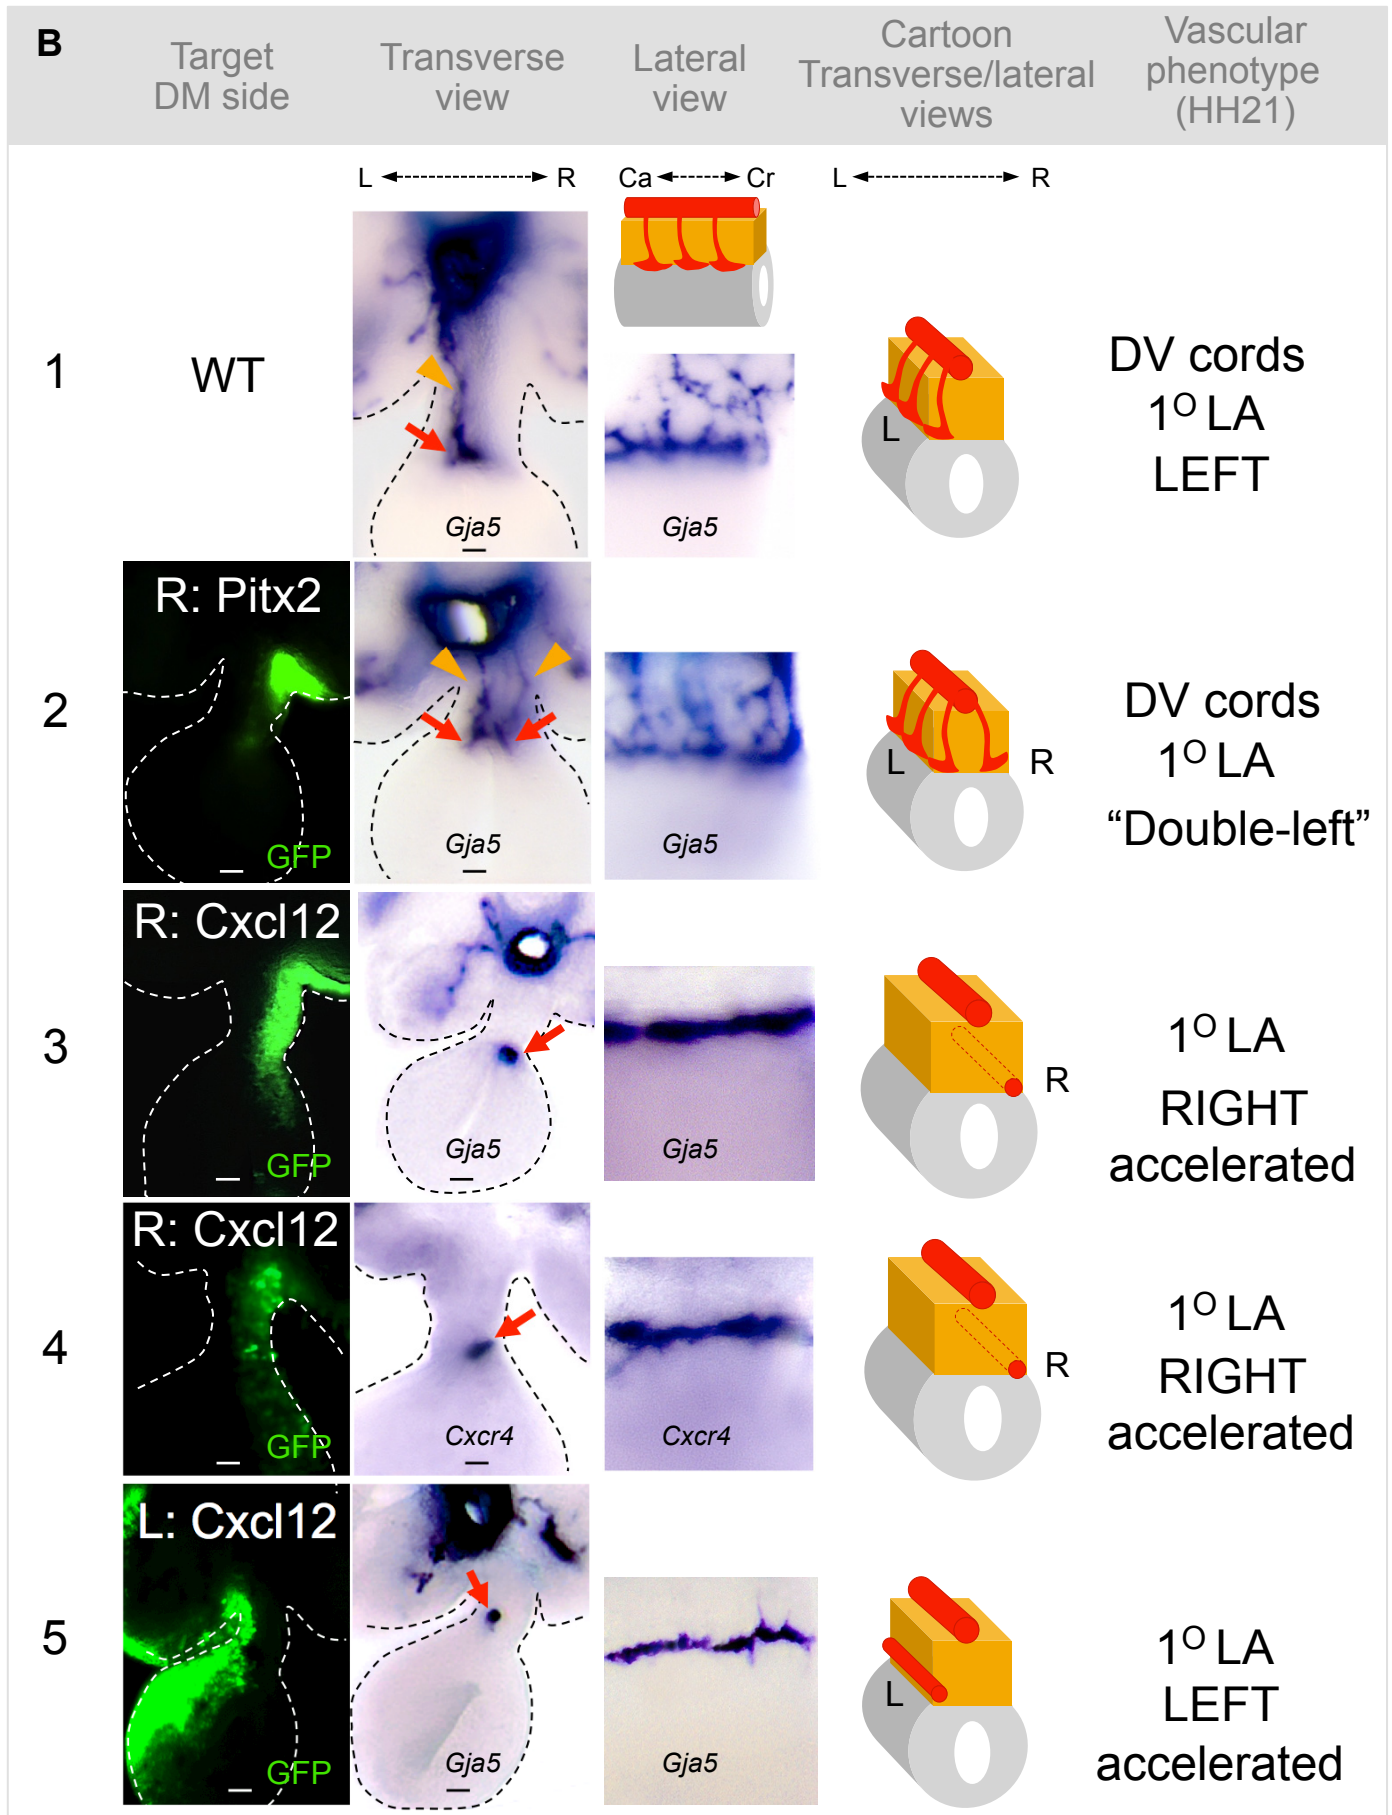

Fig. S6

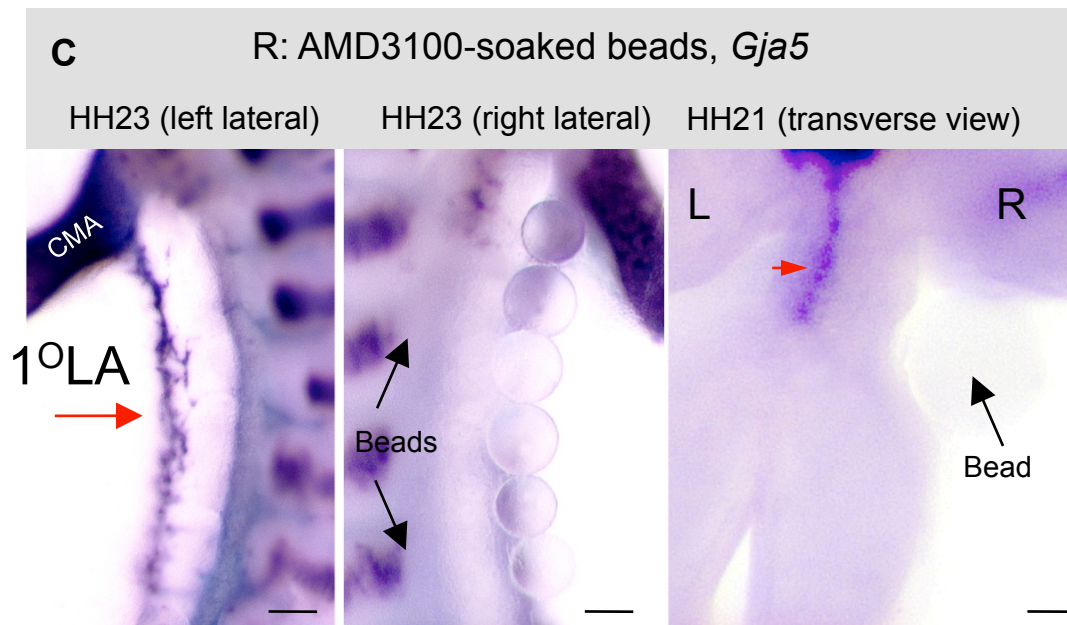



**Fig. S7**

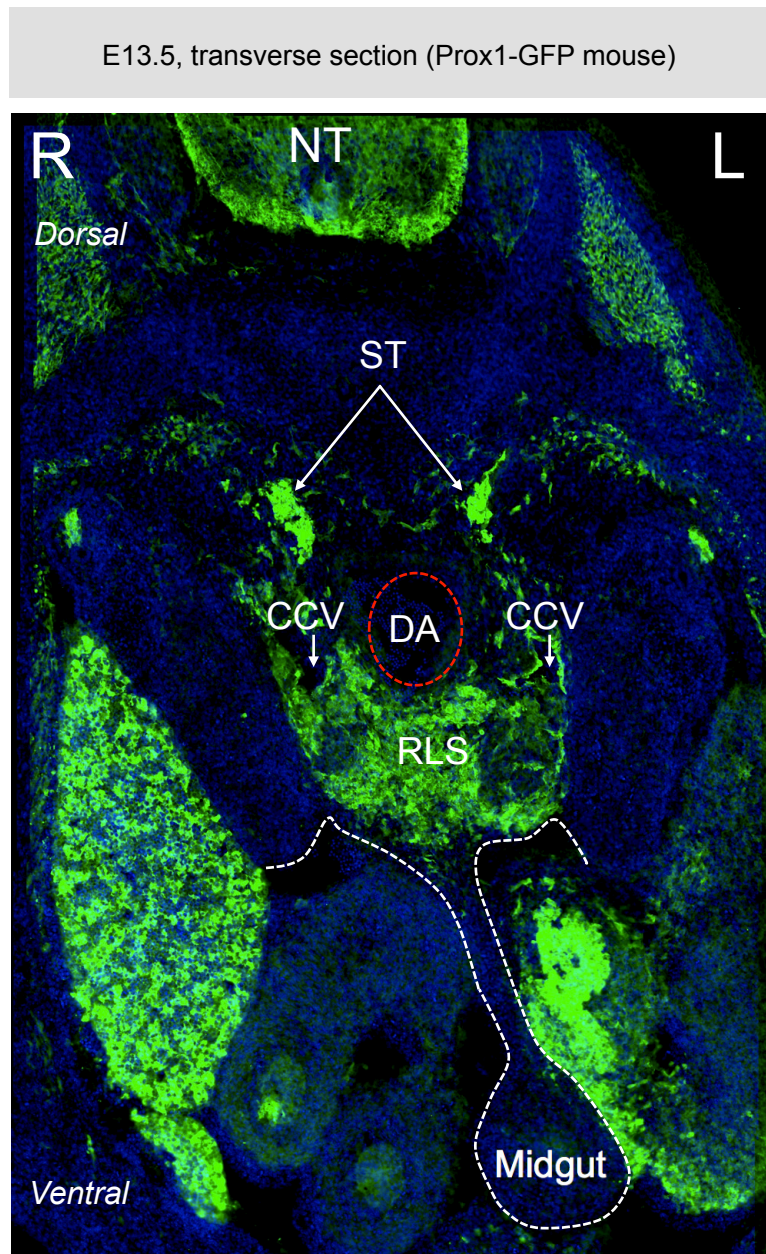



**Fig. S7**

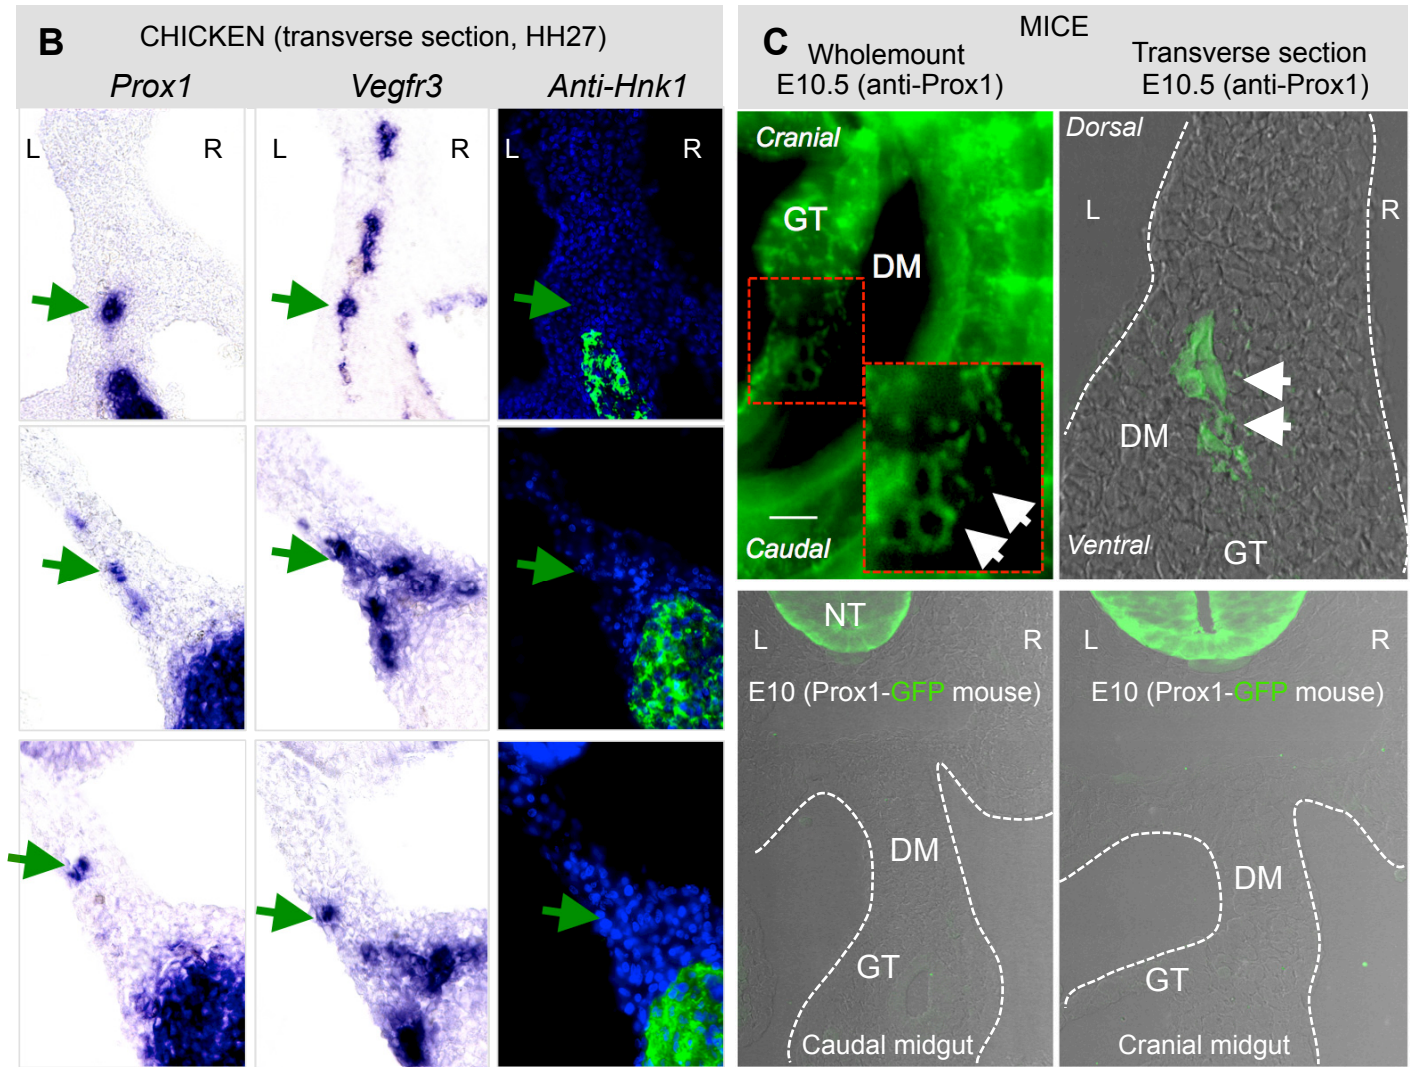

**Fig. S8**

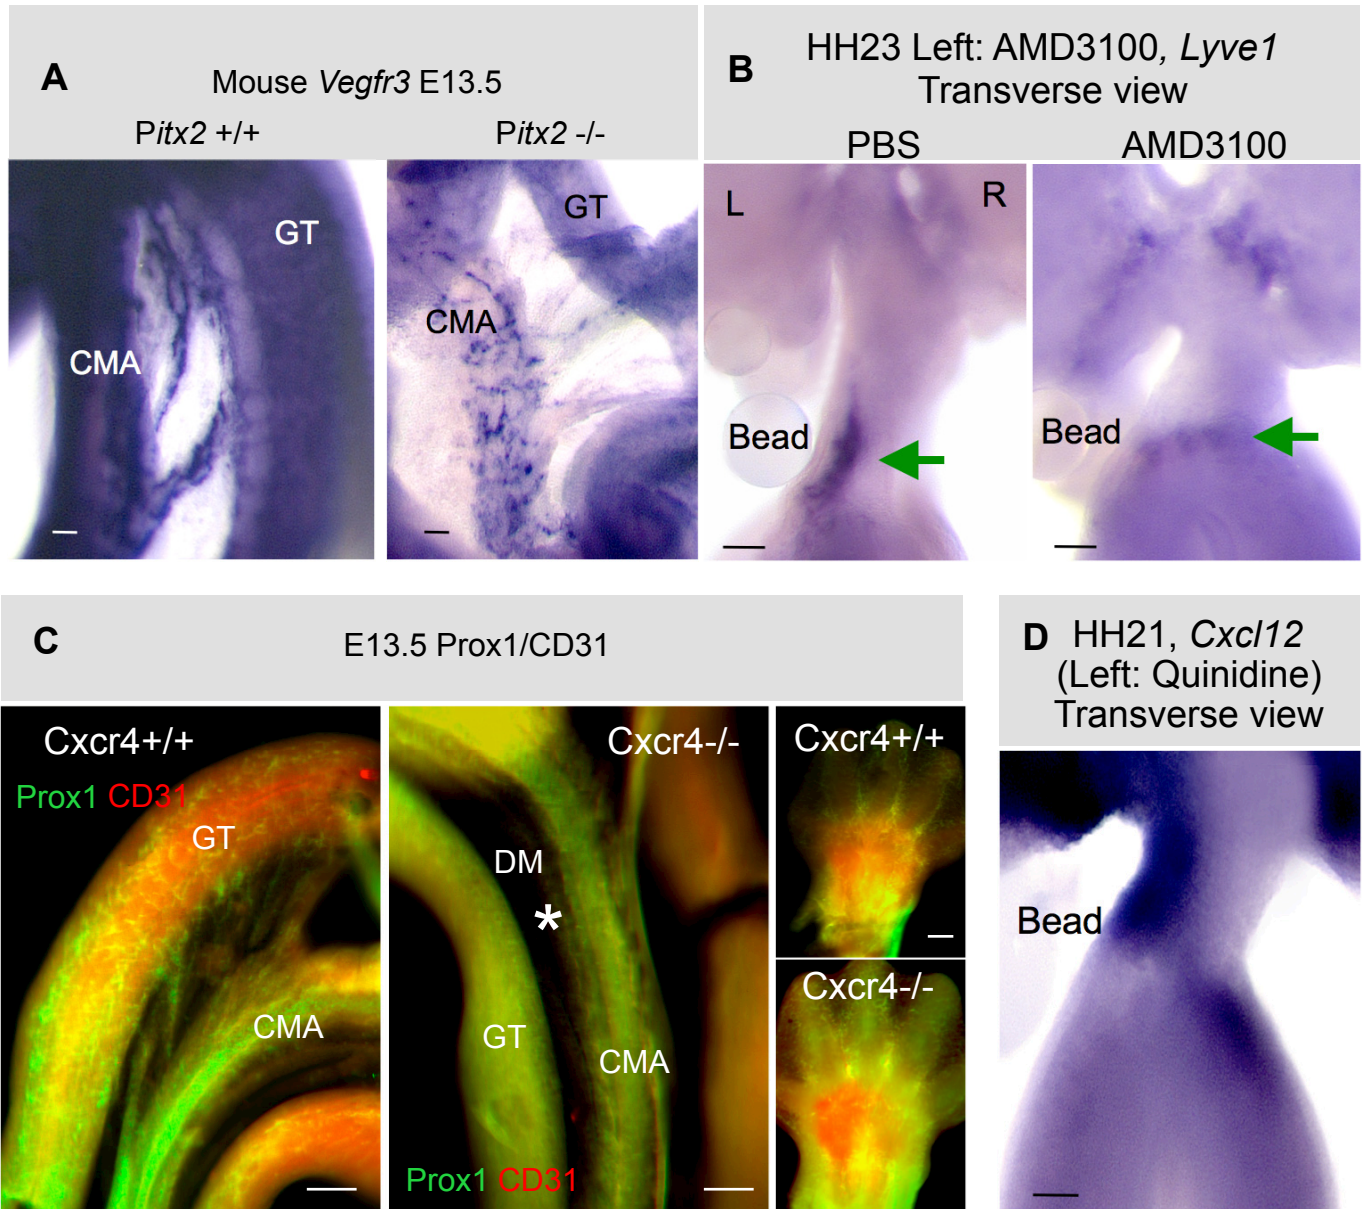

Supplement: NIHMS647036-supplement-2.pdf [file NIHMS647036-supplement-2.pdf]
